# Supplementary material for: Differential expression of MAGEA6 toggles autophagy to promote pancreatic cancer progression
Source: eLife. 2020 Apr 9;9:e48963. doi: 10.7554/eLife.48963 (PMC7164953; doi:10.7554/eLife.48963)
Supplement: Supplementary file 2. — Clinical trials of MAGEA-targeted immunotherapy reported from clinicaltrials.gov. [file elife-48963-supp2.xlsx]

## Sheet: Tab1
Supplementary File 2. List of clinical trials of cancer immunotherapy targeting MAGEA antigens
Rank	NCT Number	Title	Acronym	MAGEA antigen	Recruitment	Study Results	Conditions	Interventions	Outcome Measures	Sponsor/Collaborators	Gender	Age	Phases	Enrollment	Funded Bys	Study Type	Study Designs	Other IDs	Start Date	Primary Completion Date	Completion Date	First Posted	Results First Posted	Last Update Posted	Locations	URL
1	NCT02879760	Oncolytic MG1-MAGEA3 With Ad-MAGEA3 Vaccine in Combination With Pembrolizumab for Non-Small Cell Lung Cancer Patients	null	MAGEA3	Recruiting	No Results Available	Non-Small Cell Lung Cancer	Biological: Ad-MAGEA3|Biological: MG1-MAGEA3|Biological: Pembrolizumab	Phase 1 - Toxicity as measured by adverse events|Phase 2 - Objective tumour response rate (ORR) based on RECIST v1.1	Turnstone Biologics, Inc.|Chiltern International Inc.	All	18 Years and older Â (Adult, Senior)	Phase 1|Phase 2	61	Industry	Interventional	Intervention Model: Single Group Assignment|Masking: None (Open Label)|Primary Purpose: Treatment	Ad/MG1-MAGEA3-001 (Sandpiper)	2017-03-08	2020-01-01	2021-08-01	2016-08-26	null	2017-09-05	Juravinski Cancer Centre, Hamilton, Ontario, Canada|Ottawa Hospital Research Institute, Ottawa, Ontario, Canada|University Health Network, Toronto, Ontario, Canada	https://ClinicalTrials.gov/show/NCT02879760
2	NCT02592577	MAGE A10c796T for Advanced NSCLC	null	MAGEA10	Recruiting	No Results Available	Non-Small Cell Lung Cancer|Carcinoma	Biological: Autologous Genetically modified T cells, MAGEA10c796T	Number of subjects with dose-limiting toxicity (DLT) and adverse events (AE), including serious adverse events (SAE)|Proportion of subjects with a confirmed Complete Response (CR) or Partial Response (PR)|Interval between the date of first T cell infusion dose and first documented evidence of CR or PR|Interval between the date of first documented evidence of CR or PR until first documented diseas…	Adaptimmune	All	18 Years and older Â (Adult, Senior)	Phase 1	28	Industry	Interventional	Intervention Model: Single Group Assignment|Masking: None (Open Label)|Primary Purpose: Treatment	ADP 0022-003	2015-11-01	2019-04-01	2019-04-01	2015-10-30	null	2018-02-23	City of Hope, Duarte, California, United States|Stanford Cancer Center, Palo Alto, California, United States|University of Miami Sylvester Comprehensive Cancer Center, Miami, Florida, United States|H. Lee Moffitt Cancer Center, Tampa, Florida, United States|Winship Cancer Institute of Emory University, Atlanta, Georgia, United States|Indiana University Simon Cancer Center, Indianapolis, Indiana, …	https://ClinicalTrials.gov/show/NCT02592577
3	NCT03132922	MAGEA4c1032T for Multi-Tumor	null	MAGEA4	Recruiting	No Results Available	Bladder Cancer|Melanoma|Head and Neck Cancer|Ovarian Cancer|Non-Small Cell Lung Cancer|Esophageal Cancer|Gastric Cancer	Genetic: Autologous genetically modified MAGEA4c1032T cells	Number of subjects with adverse events (AE), including serious adverse events (SAEs).|Determining dose limiting toxicities (DLT) and optimally tolerated dose range|Evaluation of persistence of genetically modified T cells.|Measurement of RCL in genetically modified T cells.|Proportion of subjects with a confirmed Complete Response (CR) and/or Partial Response (PR).|Interval between the date of fi…	Adaptimmune	All	18 Years and older Â (Adult, Senior)	Phase 1	32	Industry	Interventional	Intervention Model: Single Group Assignment|Masking: None (Open Label)|Primary Purpose: Treatment	ADP-0044-001	2017-05-15	2020-09-01	2020-09-01	2017-04-28	null	2018-02-06	Tennessee Oncology - Sarah Cannon Research Institute, Nashville, Tennessee, United States|M.D. Anderson Cancer Center, Houston, Texas, United States|Princess Margaret Cancer Centre, Toronto, Ontario, Canada	https://ClinicalTrials.gov/show/NCT03132922
4	NCT03139370	A Study Evaluating the Safety and Efficacy of MAGEA3/A6 T Cell Receptor Engineered T Cells (KITE-718) in HLA-DPB1*04:01 Positive Subjects With Advanced Cancers	null	MAGEA3, MAGEA6	Recruiting	No Results Available	Solid Tumor	Genetic: Autologous genetically modified MAGEA3/A6 TCR transduced T cells (KITE-718)|Diagnostic Test: MAGEA3/A6 test	Phase 1A - Safety: Maximum Tolerated Dose|Phase 1B - Efficacy: Objective Response Rate	Kite, A Gilead Company	All	18 Years and older Â (Adult, Senior)	Phase 1	50	Industry	Interventional	Intervention Model: Single Group Assignment|Masking: None (Open Label)|Primary Purpose: Treatment	KITE-718-301	2017-05-08	2019-02-01	2024-02-01	2017-05-03	null	2017-11-29	Moffitt Cancer Center, Tampa, Florida, United States|Icahn School of Medicine at Mount Sinai, New York, New York, United States|Memorial Sloan Kettering Cancer Center, New York, New York, United States|MD Anderson Cancer Center, Houston, Texas, United States	https://ClinicalTrials.gov/show/NCT03139370
5	NCT02989064	MAGEA10c796T for Urothelial Cancer, Melanoma or Head and Neck Cancers	null	MAGEA10	Recruiting	No Results Available	Urinary Bladder Cancer|Head and Neck Cancer|Melanoma	Genetic: Autologous genetically modified MAGE A10c796T cells	Number of subjects with adverse events (AE), including serious adverse events (SAE).|Evaluation of the persistence of genetically modified T cells|Measurement of RCL in genetically modified T cells.|Proportion of subjects with a confirmed Complete Response (CR) and/or Partial Response (PR).|Interval between the date of first T cell infusion dose and first documented evidence of CR or PR.|Interval…	Adaptimmune	All	18 Years and older Â (Adult, Senior)	Phase 1	22	Industry	Interventional	Intervention Model: Single Group Assignment|Masking: None (Open Label)|Primary Purpose: Treatment	ADP-0022-004	2016-10-01	2019-11-01	2020-05-01	2016-12-12	null	2018-01-11	Massachusetts General Hospital, Boston, Massachusetts, United States|Tennessee Oncology - Sarah Cannon Research Institute, Nashville, Tennessee, United States|MD Anderson Cancer Center, Houston, Texas, United States|Princess Margaret Cancer Centre, Toronto, Ontario, Canada	https://ClinicalTrials.gov/show/NCT02989064
7	NCT01694472	Clinical Safety and Preliminary Efficacy of MAGEA4 TCR Gene-Modified T Cells to Treat Malignant Tumors	null	MAGEA4	Unknown status	No Results Available	Malignant Solid Tumors	Biological: MAGEA4 TCR Gene-Modified T Cells	Objective response rate	Tianjin Medical University Cancer Institute and Hospital	All	18 Years to 80 Years Â (Adult, Senior)	Phase 1	15	Other	Interventional	Intervention Model: Single Group Assignment|Masking: None (Open Label)|Primary Purpose: Supportive Care	CIH-RXB-201205002	2012-07-01	2016-11-01	2016-12-01	2012-09-27	null	2015-12-22	Tianjin Medical University Cancer Institute and Hospital, Tianjin, Tianjin, China	https://ClinicalTrials.gov/show/NCT01694472
9	NCT01437605	Phase II Study to Assess the Safety and Immunogenicity of recMAGEA3+AS15 ASCI With or Without Poly IC:LC	null	MAGEA3	Active, not recruiting	No Results Available	Melanoma	Drug: MAGEA3 ASCI injections without Poly IC:LC|Drug: MAGEA3 ASCI injections with Poly IC:LC	Number of Participants With Adverse Events Related to Study Treatment|Immunogenicity Per Treatment Arm|Median Relapse-Free Survival (RFS)|Median Overall Survival (OS)	H. Lee Moffitt Cancer Center and Research Institute|GlaxoSmithKline|Oncovir, Inc.	All	18 Years and older Â (Adult, Senior)	Phase 2	14	Other|Industry	Interventional	Allocation: Randomized|Intervention Model: Parallel Assignment|Masking: None (Open Label)|Primary Purpose: Treatment	MCC-16545	2011-10-11	2018-09-30	2019-09-30	2011-09-21	null	2017-12-12	H. Lee Moffitt Cancer Center and Research Institute, Tampa, Florida, United States	https://ClinicalTrials.gov/show/NCT01437605
10	NCT02153905	T Cell Receptor Immunotherapy Targeting MAGEA3 for Patients With Metastatic Cancer Who Are HLA-A*01 Positive	null	MAGEA3	Recruiting	No Results Available	Breast Cancer|Cervical Cancer|Renal Cancer|Melanoma|Bladder Cancer	Drug: Aldesleukin|Drug: Fludarabine|Drug: Cyclophosphamide|Biological: Anti-MAGEA3 HLAA* 01-restricted TCR	Maximum tolerated cell dose (MTD)|Response Rate|Frequency of treatment related adverse events|Engineered cell survival	National Cancer Institute (NCI)|National Institutes of Health Clinical Center (CC)	All	18 Years to 70 Years Â (Adult, Senior)	Phase 1|Phase 2	102	NIH	Interventional	Allocation: Non-Randomized|Intervention Model: Sequential Assignment|Masking: None (Open Label)|Primary Purpose: Treatment	140110|14-C-0110	2014-05-31	2023-12-29	2024-12-27	2014-06-03	null	2018-02-22	National Institutes of Health Clinical Center, 9000 Rockville Pike, Bethesda, Maryland, United States	https://ClinicalTrials.gov/show/NCT02153905
11	NCT01273181	MAGEA3/12 Metastatic Cancer Treatment With Anti-MAGEA3/12 TCR-Gene Engineered Lymphocytes	null	MAGEA3, MAGEA12	Terminated	Has Results	Metastatic Cancer|Metastatic Renal Cancer|Metastatic Melanoma	Biological: PG13-MAGEA3 TCR9W11 (anti-MAGEA3/12 TCR) Transduced Autologous Peripheral Blood Lymphocytes|Drug: Aldesleukin|Drug: Cyclophosphamide|Drug: Fludarabine	Toxicity Profile|Clinical Tumor Regression (Complete Response (CR) + Partial Response (PR)) in Patients With Metastatic Cancer	National Cancer Institute (NCI)|National Institutes of Health Clinical Center (CC)	All	18 Years and older Â (Adult, Senior)	Phase 1|Phase 2	9	NIH	Interventional	Allocation: Non-Randomized|Intervention Model: Parallel Assignment|Masking: None (Open Label)|Primary Purpose: Treatment	110062|11-C-0062	2010-12-01	2012-12-01	2012-12-01	2011-01-10	2013-03-27	2015-10-28	National Institutes of Health Clinical Center, 9000 Rockville Pike, Bethesda, Maryland, United States	https://ClinicalTrials.gov/show/NCT01273181
12	NCT01995708	CT7, MAGEA3, and WT1 mRNA-electroporated Autologous Langerhans-type Dendritic Cells as Consolidation for Multiple Myeloma Patients Undergoing Autologous Stem Cell Transplantation	null	MAGEA3	Recruiting	No Results Available	Multiple Myeloma	Biological: CT7, MAGEA3, and WT1 mRNA-electroporated Langerhans cells ( LCs)|Other: Standard of care	safety|Immune response monitoring	Memorial Sloan Kettering Cancer Center|Rockefeller University	All	18 Years and older Â (Adult, Senior)	Phase 1	20	Other	Interventional	Allocation: Randomized|Intervention Model: Parallel Assignment|Masking: None (Open Label)|Primary Purpose: Treatment	13-009	2014-01-31	2018-11-01	2018-11-01	2013-11-26	null	2017-07-06	Memorial Sloan Kettering Cancer Center, New York, New York, United States|The Rockefeller University/Center for Clinical & Translational Science, New York, New York, United States	https://ClinicalTrials.gov/show/NCT01995708
13	NCT02111850	T Cell Receptor Immunotherapy Targeting MAGEA3 for Patients With Metastatic Cancer Who Are HLA-DP0401 Positive	null	MAGEA3	Recruiting	No Results Available	Cervical Cancer|Renal Cancer|Urothelial Cancer|Melanoma|Breast Cancer	Biological: Anti-MAGEA3-DP4 TCR|Drug: Cyclophosphamide|Drug: Fludarabine|Drug: Aldesleukin	Frequency of treatment related adverse events|Response Rate|Measure Persistence	National Cancer Institute (NCI)|National Institutes of Health Clinical Center (CC)	All	18 Years to 70 Years Â (Adult, Senior)	Phase 2	107	NIH	Interventional	Allocation: Non-Randomized|Intervention Model: Parallel Assignment|Masking: None (Open Label)|Primary Purpose: Treatment	140052|14-C-0052	2014-04-09	2023-12-29	2024-12-27	2014-04-11	null	2018-03-02	National Institutes of Health Clinical Center, 9000 Rockville Pike, Bethesda, Maryland, United States	https://ClinicalTrials.gov/show/NCT02111850
14	NCT01245673	Combination Immunotherapy and Autologous Stem Cell Transplantation for Myeloma	null	MAGEA3	Active, not recruiting	No Results Available	Myeloma	Biological: Prevnar- Pneumococcal Conjugate Vaccine (PCV)|Other: Activated/costimulated autologous T-cell|Drug: Lenalidomide|Biological: MAGEA3, HiltonolÂ® (Poly-ICLC)	T-Cell responses against the MAGE-3 vaccine|Change in Paraprotein Levels|MAGEA3 Immune Responses	University of Pennsylvania	All	18 Years to 80 Years Â (Adult, Senior)	Phase 2	28	Other	Interventional	Intervention Model: Single Group Assignment|Masking: None (Open Label)|Primary Purpose: Treatment	UPCC 02710|UMGCC 0955	2011-04-01	2018-06-01	2018-08-01	2010-11-22	null	2017-12-20	University of Maryland Greenebaum Cancer Center, Baltimore, Maryland, United States|Abramson Cancer Center of the University of Pennsylvania, Philadelphia, Pennsylvania, United States	https://ClinicalTrials.gov/show/NCT01245673
15	NCT02714335	The Correlation Between MAGEA3, PRAME Polymorphism and Expression Levels of MAGEA3 and PRAME in NSCLC Patients	null	MAGEA3	Completed	No Results Available	Carcinoma, Non-Small-Cell Lung		Number of patients with at least one MAGEA3 gene single nucleotide polymorphism (SNP)	Szu-Hua Pan|GlaxoSmithKline|National Taiwan University	All	20 Years and older Â (Adult, Senior)		200	Other|Industry	Observational	Observational Model: Case-Only|Time Perspective: Retrospective	114764	2010-12-01	2013-11-01	2013-11-01	2016-03-21	null	2016-03-22		https://ClinicalTrials.gov/show/NCT02714335
16	NCT00944580	A Vaccine Study for High Risk Cancers	null	MAGEA3	Withdrawn	No Results Available	Neuroblastoma|Rhabdomyosarcoma|Osteogenic Sarcoma	Biological: MAGEA1, MAGEA3, and NY-ESO-1 Vaccine	The primary objective is to determine if there is an amplification or new development of NY-ESO-1, MAGEA1, or MAGEA3 specific CD4+ or CD8+ T cells post-vaccination.|The investigators will determine the safety of vaccine and imiquimod administration in these patients.	Penn State University	All	1 Year to 70 Years Â (Child, Adult, Senior)	Phase 1	0	Other	Interventional	Intervention Model: Single Group Assignment|Masking: None (Open Label)|Primary Purpose: Treatment	IRB 30761|PSHCI 09-033	2009-06-01	2010-08-01	2010-08-01	2009-07-23	null	2017-11-24		https://ClinicalTrials.gov/show/NCT00944580
17	NCT02285816	MG1 Maraba/MAGEA3, With and Without Adenovirus Vaccine, With Transgenic MAGEA3 Insertion in Patients With Incurable MAGEA3-Expressing Solid Tumours	I214	MAGEA3	Recruiting	No Results Available	Advanced/Metastatic Solid Tumours	Biological: MG1MA3|Biological: AdMA3	Phase I: Toxicity as measured by adverse events|Phase II: Objective tumour response rate (ORR) using RECIST v1.1.|Phase I: Number and Severity of Adverse Events in patients|Phase I: MG1MA3 clearance and secondary replication from pharmacokinetics and viral shedding|Phase I: Delivery to, and viral detection and replication within, tumours for MG1MA3|Phase I: Cellular and humoral immune response to…	Canadian Cancer Trials Group|Ottawa Hospital Research Institute	All	18 Years and older Â (Adult, Senior)	Phase 1|Phase 2	79	Other	Interventional	Allocation: Non-Randomized|Intervention Model: Parallel Assignment|Masking: None (Open Label)|Primary Purpose: Treatment	I214	2014-10-31	2018-07-01	2018-12-01	2014-11-07	null	2018-02-14	BCCA - Vancouver Cancer Centre, Vancouver, British Columbia, Canada|Juravinski Cancer Centre at Hamilton Health Sciences, Hamilton, Ontario, Canada|Ottawa Hospital Research Institute, Ottawa, Ontario, Canada|University Health Network, Toronto, Ontario, Canada	https://ClinicalTrials.gov/show/NCT02285816
19	NCT01425749	Study to Assess Safety and Immune Response of Stage IIB-IV Resected Melanoma After Treatment With MAGEA3 ASCI	Mel55	MAGEA3	Completed	Has Results	Melanoma	Biological: recMAGEA3 + AS15 ASCI	Number of Participants With Treatment-related Adverse Events as a Measure of Safety and Tolerability|Enumeration of CD4 and CD8 T Cell Responses to MAGEA3 Epitopes in the Injection Site-draining Lymph Node (Sentinel Immunized Node, SIN) as a Measure of Immunogenicity.|Enumeration of CD4+ and CD8+ T Cells Reactive to MAGEA3 Epitopes in Peripheral Blood as a Measure of Immunogenicity.|Identificatio…	Craig L Slingluff, Jr|GlaxoSmithKline|University of Virginia	All	18 Years and older Â (Adult, Senior)	Early Phase 1	25	Other|Industry	Interventional	Allocation: Randomized|Intervention Model: Parallel Assignment|Masking: None (Open Label)|Primary Purpose: Treatment	CSlingluff	2011-06-01	2013-07-01	2015-10-01	2011-08-30	2016-04-04	2016-04-04	University of Virginia, Charlottesville, Virginia, United States	https://ClinicalTrials.gov/show/NCT01425749
20	NCT01435356	Safety and Efficacy Study of Cancer Immunotherapeutic MAGEA3 + AS-15 in Patients With Muscle-invasive Bladder Cancer After Cystectomy	MAGNOLIA	MAGEA3	Terminated	No Results Available	Urinary Bladder Neoplasms	Biological: recMAGEA3 + AS15 ASCI|Biological: Placebo	Disease free survival|Overall survival|Disease-free survival (DFS)|Disease-free specific survival (DFSS)|Distant metastasis-free survival (DMFS)|(Serious) Adverse events|Immune response to recMAGEA3 + AS15 ASCI|Translational research on gene signature and expression|Translational Research on tumor microenvironment and lymphocyte infiltration	European Association of Urology Research Foundation|GlaxoSmithKline	All	18 Years and older Â (Adult, Senior)	Phase 2	83	Other|Industry	Interventional	Allocation: Randomized|Intervention Model: Parallel Assignment|Masking: Quadruple (Participant, Care Provider, Investigator, Outcomes Assessor)|Primary Purpose: Prevention	EAU RF 2010-01|NTR2846|2010-024355-85	2011-08-01	2017-04-07	2017-04-07	2011-09-16	null	2017-06-16	Faculty teaching Hospital in Plzen, Plzen, Czechia|Hospital Motol, Prague, Czechia|Thomayerova nemocnice, Prague, Czechia|Krajska zdravotni, a.s. - Masarykova nemocnice v Usti nad Labem, o.z., Usti nad Labem, Czechia|Institut BergoniÃ©, Bordeaux, France|HÃ´pital Huriez, Lille, France|HÃ´pital Edouard Herriot, Lyon, France|Institut Curie, Paris, France|HÃ´pital Rangueil, Toulouse, France|Universit…	https://ClinicalTrials.gov/show/NCT01435356
21	NCT01380145	MAGEA3 Protein + AS15 as Consolidation for Multiple Myeloma Patients Undergoing Autologous Stem Cell Transplantation	null	MAGEA3	Completed	Has Results	Multiple Myeloma	Biological: recMAGEA3 Protein + AS15 Adjuvant	Assessment of Safety of recMAGEA3 + AS15|Induction or Augmentation of MAGEA3-Specific Humoral Immunity|Induction or Augmentation of MAGEA3-Specific Cellular Immunity|Assessment of Tumor Response|Assessment of Survival and Time to Subsequent Therapy	Ludwig Institute for Cancer Research|GlaxoSmithKline|Mount Sinai Hospital, New York|New York University School of Medicine|Fox Chase Cancer Center|Memorial Sloan Kettering Cancer Center	All	18 Years and older Â (Adult, Senior)	Phase 1	13	Other|Industry	Interventional	Intervention Model: Single Group Assignment|Masking: None (Open Label)|Primary Purpose: Treatment	LGS 2009-005|10-051|10-216	2011-09-01	2014-07-01	2014-11-01	2011-06-27	2016-12-22	2016-12-22	New York University School of Medicine, New York, New York, United States|Mount Sinai Hospital, New York, New York, United States|Memorial Sloan-Kettering Cancer Center, New York, New York, United States|Fox Chase Cancer Center, Philadelphia, Pennsylvania, United States	https://ClinicalTrials.gov/show/NCT01380145
22	NCT02096614	Investigator Initiated Phase 1 Study of TBI-1201	null	MAGEA4	Recruiting	No Results Available	Solid Tumors	Drug: TBI-1201|Drug: Cyclophosphamide|Drug: Fludarabine	Incidence and grade of adverse events (CTCAE)|Appearance of replication competent retrovirus by PCR|Appearance of clonality by LAM-PCR|Kinetics of TBI-1201 in blood by realtime-PCR and flow cytometry	Mie University|Takara Bio Inc.|Shionogi|Fiverings Co., Ltd.|Statcom Co. Ltd.	All	20 Years and older Â (Adult, Senior)	Phase 1	12	Other|Industry	Interventional	Allocation: Non-Randomized|Intervention Model: Single Group Assignment|Masking: None (Open Label)|Primary Purpose: Treatment	1201-01	2014-04-01	2018-06-01	null	2014-03-26	null	2017-11-08	Mie University Hospital, Tsu, Mie, Japan	https://ClinicalTrials.gov/show/NCT02096614
23	NCT01266603	High-Dose Interleukin-2 (HDIL-2), Combined With recMAGEA3 + AS15 ASCI	null	MAGEA3	Active, not recruiting	No Results Available	Melanoma	Drug: HDIL-2|Biological: recMAGEA3 + AS15	Objective Response Rate	M.D. Anderson Cancer Center|GlaxoSmithKline	All	18 Years and older Â (Adult, Senior)	Phase 2	30	Other|Industry	Interventional	Intervention Model: Single Group Assignment|Masking: None (Open Label)|Primary Purpose: Treatment	2010-0113|NCI-2011-00282	2012-02-01	2019-02-01	2019-02-01	2010-12-24	null	2017-09-15	University of Texas MD Anderson Cancer Center, Houston, Texas, United States	https://ClinicalTrials.gov/show/NCT01266603
26	NCT00942162	A Study to Test the Benefit of a New Anti-cancer Treatment in Patients With Unresectable Advanced Melanoma	PREDICT	MAGEA3	Completed	No Results Available	Melanoma	Biological: Immunotherapeutic GSK2132231A	Overall survival rate of patients with the predictive gene signature|Progression-free survival (PFS)|Progression status|Overall survival (OS)|Time to Treatment Failure (TTF)|Best clinical response|Duration of response for patients with Complete Response, Partial Response or Stable Disease status|Evaluation of humoral immune response in terms of antibody titers, seropositivity and seroconversion r…	GlaxoSmithKline	All	18 Years and older Â (Adult, Senior)	Phase 2	125	Industry	Interventional	Intervention Model: Single Group Assignment|Masking: None (Open Label)|Primary Purpose: Treatment	111476|2008-004007-64	2009-08-01	2012-06-01	2015-04-01	2009-07-20	null	2015-08-20	GSK Investigational Site, Los Angeles, California, United States|GSK Investigational Site, Los Angeles, California, United States|GSK Investigational Site, Orange, California, United States|GSK Investigational Site, Aurora, Colorado, United States|GSK Investigational Site, Orlando, Florida, United States|GSK Investigational Site, Stuart, Florida, United States|GSK Investigational Site, Tampa, Flo…	https://ClinicalTrials.gov/show/NCT00942162
27	NCT01483274	Decitabine and Vaccine Therapy for Patients With Relapsed AML Following Allogeneic Stem Cell Transplantation	AML	MAGEA3	Withdrawn	No Results Available	Acute Myelogenous Leukemia	Biological: Vaccine	Tolerance of study treatment|Disease Response|Immune Response	University of Louisville	All	18 Years to 75 Years Â (Adult, Senior)	Phase 1	0	Other	Interventional	Allocation: Non-Randomized|Intervention Model: Single Group Assignment|Masking: None (Open Label)|Primary Purpose: Treatment	13.0376	2015-03-01	2015-06-01	2015-06-01	2011-12-01	null	2017-05-09	University of Louisville, Louisville, Kentucky, United States	https://ClinicalTrials.gov/show/NCT01483274
28	NCT02636855	Screening Protocol for Tumor Antigen Expression Profiling and HLA Typing for Eligibility Determination	null	MAGEA10	Recruiting	No Results Available	Solid and Hematological Malignancies		Frequency of subjects with the expression (gene or protein) of multiple antigens (including, but are not limited to NY-ESO-1 and/or LAGE-1a, MAGE A10, and others)|Retention of screening tumor tissue for the future development and validation of single and/or multi-plex companion diagnostic platforms for the detection of tumor antigen expression.	Adaptimmune	All	18 Years and older Â (Adult, Senior)		300	Industry	Observational	Observational Model: Case-Only|Time Perspective: Prospective	ADP-0000-001	2015-12-01	2025-11-01	2025-11-01	2015-12-22	null	2018-03-02	City of Hope, Duarte, California, United States|Stanford Cancer Institute (Stanford University), Stanford, California, United States|University of Miami, Sylvester Comprehensive Cancer Center, Miami, Florida, United States|H. Lee Moffitt Cancer Center, Tampa, Florida, United States|Winship Cancer Institute - Emory University, Atlanta, Georgia, United States|Indiana University Simon Cancer Center,…	https://ClinicalTrials.gov/show/NCT02636855
29	NCT00896480	Study of GSK2132231A Antigen-Specific Cancer Immunotherapeutic in Patients With Inoperable Metastatic Cutaneous Melanoma	null	MAGEA3	Completed	No Results Available	Melanoma	Biological: Immunotherapeutic GSK2132231A	Tumor response defined as objective response (complete or partial), stable disease or mixed response|Time to treatment failure defined as the interval from the first administration of the study treatment until the patient is withdrawn from treatment|Occurrence of Grade 3 or 4 adverse events possibly related to the study treatment|Occurrence of serious adverse events|Occurrence of adverse events|I…	GlaxoSmithKline	All	18 Years and older Â (Adult, Senior)	Phase 2	24	Industry	Interventional	Intervention Model: Single Group Assignment|Masking: None (Open Label)|Primary Purpose: Treatment	111473	2009-05-01	2014-11-01	2014-11-01	2009-05-11	null	2015-10-15	GSK Investigational Site, Brussels, Belgium|GSK Investigational Site, Brussel, Belgium|GSK Investigational Site, Bruxelles, Belgium|GSK Investigational Site, LiÃ¨ge, Belgium|GSK Investigational Site, Wilrijk, Belgium|GSK Investigational Site, Yvoir, Belgium|GSK Investigational Site, Caen, France|GSK Investigational Site, Lille, France|GSK Investigational Site, Paris Cedex 10, France|GSK Investiga…	https://ClinicalTrials.gov/show/NCT00896480
31	NCT01308294	Immunotherapy of HLA-A2 Positive Stage II-IV Melanoma Patients	LAG-3/IMP321	MAGEA3	Terminated	No Results Available	Melanoma	Biological: 2 vaccine injections in 1 limb|Biological: 2 vaccine injections in different limbs|Biological: 2 vaccine injections in different limbs, the vaccine does not contain the MHC class II peptide MAGEA3-DP4	Safety of vaccination will be assessed according to NCI CTC scale|Immunological response (tumor antigen specific CD4 and CD8 T cell reactivity) will be measured by Tetramer analysis and ELISpot assays|Tumor response will be assessed by radiology in patients with measurable disease	Centre Hospitalier Universitaire Vaudois|Immutep S.A.	All	18 Years and older Â (Adult, Senior)	Phase 1|Phase 2	16	Other|Industry	Interventional	Allocation: Non-Randomized|Intervention Model: Parallel Assignment|Masking: None (Open Label)|Primary Purpose: Treatment	P009-2010DR1082	2010-06-01	2014-04-01	2014-04-01	2011-03-04	null	2014-10-15	Oncology Department, CHUV, Lausanne, Vaud, Switzerland	https://ClinicalTrials.gov/show/NCT01308294
33	NCT01333046	Administration of TAA-Specific CTLs; Hodgkin or Non-Hodgkin Lymphoma; TACTAL	TACTAL	MAGEA4	Recruiting	No Results Available	Hodgkin Lymphoma|Non-Hodgkin Lymphoma|Hodgkin Disease	Biological: Antigen-Escalation Stage|Biological: Dose-Escalation Stage|Biological: azacytidine and multiTAA T cells Stage|Biological: Pediatric multiTAA T cells Stage	Assessment of patients with adverse events|Number of Patients with treatment related Serious Adverse Events|Obtain information on the expansion, persistence and anti-tumor effects of the adoptively-transferred TAA-specific CTLs|Assessment of increasing the spectrum of epitopes/antigens	Baylor College of Medicine|Center for Cell and Gene Therapy, Baylor College of Medicine|Texas Children's Hospital|The Methodist Hospital System|National Cancer Institute (NCI)	All	18 Years and older Â (Adult, Senior)	Phase 1	74	Other|NIH	Interventional	Allocation: Non-Randomized|Intervention Model: Parallel Assignment|Masking: None (Open Label)|Primary Purpose: Treatment	H-27471-TACTAL|TACTAL|2P50CA126752-11	2012-01-01	2021-01-01	2026-01-01	2011-04-11	null	2018-02-22	Houston Methodist Hospital, Houston, Texas, United States|Texas Children's Hospital, Houston, Texas, United States	https://ClinicalTrials.gov/show/NCT01333046
35	NCT02686424	Tumor Markers Study in Gastric Cancer for Cancer Immunotherapy (ONCO-RD 010 CRT)	ONCO-RD010CRT	MAGEA3	Suspended	No Results Available	Stomach Neoplasms		overall survival	Seoul National University Hospital|GlaxoSmithKline	All	Child, Adult, Senior		250	Other|Industry	Observational	Observational Model: Cohort|Time Perspective: Retrospective	ONCO-RD 010 CRT (114824)	2010-03-01	2015-01-01	null	2016-02-19	null	2016-02-23		https://ClinicalTrials.gov/show/NCT02686424
36	NCT03192462	TAA Specific Cytotoxic T Lymphocytes in Patients With Pancreatic Cancer	TACTOPS	MAGEA4	Recruiting	No Results Available	Pancreatic Cancer	Biological: multiTAA specific T cells	Number of patients with treatment related serious adverse events|Number of patients who received 6 infusions of multiTAA-specific T cells|Progression Free Survival using the Kaplan-Meier method|Overall Survival using the Kaplan-Meier method	Baylor College of Medicine|Center for Cell and Gene Therapy, Baylor College of Medicine|The Methodist Hospital System|Pancreatic Cancer Action Network|The V Foundation for Cancer Research|Harris County Hospital District	All	18 Years and older Â (Adult, Senior)	Phase 1|Phase 2	45	Other	Interventional	Allocation: Non-Randomized|Intervention Model: Parallel Assignment|Masking: None (Open Label)|Primary Purpose: Treatment	H-40378 TACTOPS	2018-01-18	2021-05-01	2025-11-01	2017-06-20	null	2018-02-02	Baylor Clinic, Houston, Texas, United States|Houston Methodist Hospital, Houston, Texas, United States|Harris Health System - Smith Clinic, Houston, Texas, United States	https://ClinicalTrials.gov/show/NCT03192462
37	NCT03093350	TAA Specific Cytotoxic T Lymphocytes in Patients With Breast Cancer	TACTIC	MAGEA4	Recruiting	No Results Available	Breast Cancer	Biological: TAA-specific CTLs	The proportion of evaluable patients with complete response or partial response or stable disease for â‰¥10 weeks from the first infusion (6 weeks after the second infusion) according to the RECIST criteria|Median progression-free survival|Median overall survival	Baylor College of Medicine|The Methodist Hospital System|Center for Cell and Gene Therapy, Baylor College of Medicine|National Cancer Institute (NCI)|Cancer Prevention Research Institute of Texas	All	18 Years to 80 Years Â (Adult, Senior)	Phase 2	22	Other|NIH	Interventional	Intervention Model: Single Group Assignment|Masking: None (Open Label)|Primary Purpose: Treatment	H-39209 TACTIC	2017-10-10	2020-03-01	2024-11-01	2017-03-28	null	2018-01-23	Houston Methodist Hospital, Houston, Texas, United States|Smith Clinic - Harris Health System, Houston, Texas, United States	https://ClinicalTrials.gov/show/NCT03093350
38	NCT02291848	TUMOR-ASSOCIATED ANTIGEN-SPECIFIC CYTOTOXIC T-LYMPHOCYTES FOR MULTIPLE MYELOMA	TACTAM	MAGEA4	Recruiting	No Results Available	Multiple Myeloma	Biological: TAA-specific CTLs	Number of Patients with Adverse events|Expansion of the CTLs|Persistence of the CTLs|Reduction of the Multiple Myeloma	Baylor College of Medicine|The Methodist Hospital System|Center for Cell and Gene Therapy, Baylor College of Medicine	All	18 Years and older Â (Adult, Senior)	Phase 1	36	Other	Interventional	Allocation: Non-Randomized|Intervention Model: Single Group Assignment|Masking: None (Open Label)|Primary Purpose: Treatment	H-35626, TACTAM	2015-04-01	2019-04-01	2021-04-01	2014-11-17	null	2018-02-09	Houston Methodist Hospital, Houston, Texas, United States	https://ClinicalTrials.gov/show/NCT02291848
39	NCT02239861	TAA-Specific CTLS for Solid Tumors (TACTASOM)	null	MAGEA4	Recruiting	No Results Available	Rhabdomyosarcoma	Biological: TAA-Specific CTLs	Number of patients with dose-limiting toxicity.|Number of patients with a disease response to the CTLs.	Baylor College of Medicine|The Methodist Hospital System|Center for Cell and Gene Therapy, Baylor College of Medicine|Texas Children's Hospital|Solving Kidsâ€™ Cancer|Pierce Phillips Charity	All	2 Years to 80 Years Â (Child, Adult, Senior)	Phase 1	18	Other	Interventional	Intervention Model: Single Group Assignment|Masking: None (Open Label)|Primary Purpose: Treatment	H-35425, TACTASOM	2015-04-01	2018-10-01	2018-12-01	2014-09-15	null	2018-01-23	Houston Methodist Hospital, Houston, Texas, United States|Texas Children's Hospital, Houston, Texas, United States	https://ClinicalTrials.gov/show/NCT02239861
41	NCT01498172	BCG Modulation of the recMAGEA3 + AS15 ASCI Response in the Treatment of Non Muscle Invasive Bladder Cancer (NMIBC) Patients	null	MAGEA3	Completed	No Results Available	Bladder Cancer	Biological: MAGEA3 ASCI|Biological: BCG	Recording adverse events by assessment of vital signs, physical examination, haematology and blood chemistry to measure safety and tolerability|Flow cytometric analysis of type and number of immune cell types in urine|Measurement of titers of antibodies against recMAGEA3 in serum|Assessment of disease recurrence by control cystoscopy	Patrice Jichlinski|Ludwig Center for Cancer Research of Lausanne|GlaxoSmithKline|University of Lausanne Hospitals	All	18 Years and older Â (Adult, Senior)	Phase 1	23	Other|Industry	Interventional	Allocation: Non-Randomized|Intervention Model: Parallel Assignment|Masking: None (Open Label)|Primary Purpose: Treatment	URO-68/11	2012-01-01	2015-02-01	null	2011-12-23	null	2015-02-04	Centre Hospitalier Universitaire Vaudois (CHUV), Lausanne, Switzerland	https://ClinicalTrials.gov/show/NCT01498172
42	NCT02332889	Phase I/II: Decitabine/Vaccine Therapy in Relapsed/Refractory Pediatric High Grade Gliomas/Medulloblastomas/CNS PNETs	null	MAGEA3	Terminated	No Results Available	Gliomas|Medulloblastoma|Neuroectodermal Tumors, Primitive	Biological: Vaccine (autologous dendritic cells)|Drug: Decitabine and Hiltonol	Tolerability (absence of adverse events) of the treatment regimen|Monitor the frequency of non-hematologic toxicity of the treatment regimen|Determine any amplification or new development of NY-ESO-1, MAGEA1, or MAGEA3 specific T cells and/or antibodies|Describe changes in T cell and antibody responses|Describe response to therapy	University of Louisville	All	2 Years to 25 Years Â (Child, Adult)	Phase 1|Phase 2	1	Other	Interventional	Intervention Model: Single Group Assignment|Masking: None (Open Label)|Primary Purpose: Treatment	14.0855	2015-04-01	2016-07-01	2016-07-01	2015-01-07	null	2017-05-09	Pediatric Hematology/Oncology University of Louisville, Louisville, Kentucky, United States|University of Louisville, Kosair Children's Charities Pediatric Clinical Research Unit, Louisville, Kentucky, United States|University of Louisville, Louisville, Kentucky, United States	https://ClinicalTrials.gov/show/NCT02332889
44	NCT00849875	A Study of Safety and Clinical Activity of Immunotherapy Plus Chemotherapy in Metastatic Melanoma Patients	null	MAGEA3	Terminated	Has Results	Melanoma	Biological: Immunotherapeutic GSK2132231A|Drug: Dacarbazine	Number of Patients Reported With Unsolicited Adverse Events (AEs) That Were Causally Related to Treatment Administration by Maximum Grade.|Number of Patients Reported With Serious Adverse Events (SAEs)|Number of Seroconverted Patients for Melanoma Antigen (Anti-MAGEA3)|Anti-MAGEA3 Antibody Concentrations|Number of Patients With Treatment Response for Anti-MAGEA3 Antibodies|Concentrations of Antib…	GlaxoSmithKline	All	18 Years and older Â (Adult, Senior)	Phase 2	48	Industry	Interventional	Intervention Model: Single Group Assignment|Masking: None (Open Label)|Primary Purpose: Treatment	111714	2009-05-26	2014-11-17	2014-11-17	2009-02-24	2017-03-30	2017-07-12	GSK Investigational Site, Brussels, Belgium|GSK Investigational Site, Brussel, Belgium|GSK Investigational Site, Bruxelles, Belgium|GSK Investigational Site, LiÃ¨ge, Belgium|GSK Investigational Site, Roeselare, Belgium|GSK Investigational Site, Yvoir, Belgium|GSK Investigational Site, Caen, France|GSK Investigational Site, Lille, France|GSK Investigational Site, Marseille Cedex 5, France|GSK Inve…	https://ClinicalTrials.gov/show/NCT00849875
45	NCT03391791	Long Term Follow up of Subjects Exposed to Genetically Engineered T Cell Receptors	null	MAGEA4, MAGEA10	Not yet recruiting	No Results Available	Solid and Hematological Malignancies	Genetic: Genetically engineered T Cell Receptors	Number of subjects with specific Long Term Follow-Up adverse events (AEs), including serious adverse events (SAEs) associated with administration of autologous T cell receptors that have been genetically modified by lentiviral vectors.|Measurement of Replication Competent Lentivirus (RCL) in genetically modified T cells|Persistence of genetically modified cells in the body|Assess the pattern of v…	Adaptimmune	All	18 Years and older Â (Adult, Senior)		300	Industry	Observational	Observational Model: Case-Only|Time Perspective: Prospective	ADP-0000-003	2018-01-01	2047-12-01	2047-12-01	2018-01-05	null	2018-01-05	Princess Margaret Cancer Centr, Toronto, Ontario, Canada	https://ClinicalTrials.gov/show/NCT03391791
46	NCT02750995	Peptide Vaccination in Combination With Azacitidine for Patients With MDS and AML	AZACTA	MAGEA3	Recruiting	No Results Available	Myelodysplastic Syndrome|Acute Myeloid Leukemia	Biological: NPMW-peptide vaccine|Drug: Azacitidine	Incidence of Treatment-Emergent Adverse Events [Safety and Tolerability]|Immunological evaluation	Inge HÃ¸gh Dufva|Technical University of Denmark|Herlev Hospital	All	18 Years and older Â (Adult, Senior)	Phase 1	15	Other	Interventional	Intervention Model: Single Group Assignment|Masking: None (Open Label)|Primary Purpose: Treatment	AZACTA	2016-04-01	2020-04-01	2020-09-01	2016-04-26	null	2017-09-01	Dept of Hematology, Herlev Hospital, Herlev, Denmark	https://ClinicalTrials.gov/show/NCT02750995
47	NCT01302496	Autologous TriMix-DC Therapeutic Vaccine in Combination With Ipilimumab in Patients With Previously Treated Unresectable Stage III or IV Melanoma	TriMix-Ipi	MAGEA3	Completed	No Results Available	Malignant Melanoma Stage III|Malignant Melanoma Stage IV	Biological: TriMix-DC and ipilimumab	disease control rate according to the immune-related response criteria	Bart Neyns|Vrije Universiteit Brussel|Universitair Ziekenhuis Brussel	All	18 Years and older Â (Adult, Senior)	Phase 2	39	Other	Interventional	Allocation: Non-Randomized|Intervention Model: Single Group Assignment|Masking: None (Open Label)|Primary Purpose: Treatment	UZB-VUB-10-001|2010-023058-35	2011-02-01	2013-10-01	2017-01-01	2011-02-24	null	2017-05-24	UZ Brussel, Jette, Brabant, Belgium	https://ClinicalTrials.gov/show/NCT01302496
48	NCT02203903	Multi-institutional Prospective Research of Expanded Multi-antigen Specifically Oriented Lymphocytes for the Treatment of VEry High Risk Hematopoietic Malignancies	null	MAGEA3	Recruiting	No Results Available	Relapsed/Refractory Hematopoietic Malignancies	Biological: Tumor associated antigen lymphocytes (TAA-CTL)	Safety|Tumor associated antigen lymphocytes (TAA-CTL) responses	Catherine Bollard|Children's Research Institute|Johns Hopkins University	All	6 Months to 80 Years Â (Child, Adult, Senior)	Phase 1	36	Other	Interventional	Intervention Model: Single Group Assignment|Masking: None (Open Label)|Primary Purpose: Treatment	RESOLVE	2015-01-01	2018-10-01	2018-12-01	2014-07-30	null	2017-11-01	Childrens National Medical Center, Washington, D.C., District of Columbia, United States|Shannon R. McCurdy, MD, Baltimore, Maryland, United States	https://ClinicalTrials.gov/show/NCT02203903
51	NCT01131169	Busulfan, Melphalan, Fludarabine and T-Cell Depleted Allogeneic Hematopoietic Stem Cell Transplantation Followed by Post Transplantation Donor Lymphocyte Infusions	null	MAGEA3	Active, not recruiting	No Results Available	Multiple Myeloma	Drug: busulfan, melphalan and fludarabine	To determine the rates of progression-free (PFS) and of overall survival (OS)|To assess the transplant-related morbidity and mortality for patients with multiple myeloma.|To assess the incidence of and severity of acute and chronic GvHD|To compute the current multiple myeloma free survival curve in order to account for patients who relapse and are restored to remission through DLI.|To explore the…	Memorial Sloan Kettering Cancer Center|Otsuka America Pharmaceutical|Ludwig Institute for Cancer Research	All	21 Years to 72 Years Â (Adult, Senior)	Phase 2	66	Other|Industry	Interventional	Allocation: Non-Randomized|Intervention Model: Parallel Assignment|Masking: None (Open Label)|Primary Purpose: Treatment	10-051	2010-05-01	2018-05-01	2018-05-01	2010-05-26	null	2017-11-27	Memorial Sloan Kettering Cancer Center, New York, New York, United States	https://ClinicalTrials.gov/show/NCT01131169
53	NCT01213472	Evaluation of a New Anti-cancer Immunotherapy in Patients With Non-operable and Progressing Metastatic Cutaneous Melanoma	null	MAGEA3	Active, not recruiting	No Results Available	Melanoma	Biological: GSK Biologicals' 2241658A Antigen-Specific Cancer Immunotherapeutic (ASCI)	Occurrence of severe toxicities.|The induction of objective clinical response (Complete Response (CR) or Partial Response (PR)) in the overall population.|Occurrence of objective clinical response (CR or PR) in the population of patients who present the predictive Melanoma Antigen A3 (MAGEA3) gene signature.|Occurrence of adverse events (AEs) and serious adverse events (SAEs).|Immunogenicity of t…	GlaxoSmithKline	All	18 Years and older Â (Adult, Senior)	Phase 1	34	Industry	Interventional	Intervention Model: Single Group Assignment|Masking: None (Open Label)|Primary Purpose: Treatment	112406|2010-020663-20	2011-01-31	2018-04-19	2018-04-19	2010-10-04	null	2017-12-18	GSK Investigational Site, Tampa, Florida, United States|GSK Investigational Site, Detroit, Michigan, United States|GSK Investigational Site, Grand Rapids, Michigan, United States|GSK Investigational Site, New York, New York, United States|GSK Investigational Site, Portland, Oregon, United States|GSK Investigational Site, Dallas, Texas, United States|GSK Investigational Site, North Sydney, New Sou…	https://ClinicalTrials.gov/show/NCT01213472
54	NCT01883518	Autologous Dendritic Cell Vaccine Loaded With Allogeneic Tumor Lysate Expression of Cancer Testis Antigens in Patients With Soft Tissue Sarcoma	ADCVCTAST	MAGEA3	Recruiting	No Results Available	Sarcoma|Neoplasms, Connective and Soft Tissue	Biological: Autologous dendritic cell vaccine	Achieving a six-month progression free survival (PFS) of patients receiving ADKV with soft tissue sarcomas|Median progression-free survival|Median overall survival|Objective response rate|Toxicity|Assess biological response of tumors	Petrov Research Institute of Oncology	All	18 Years and older Â (Adult, Senior)	Phase 1|Phase 2	48	Other	Interventional	Intervention Model: Single Group Assignment|Masking: None (Open Label)|Primary Purpose: Treatment	MC-01-2013	2013-06-01	2017-09-01	2017-09-01	2013-06-21	null	2017-02-15	Petrov Research Institute of Oncology, Saint-Petersburg, Russian Federation	https://ClinicalTrials.gov/show/NCT01883518
55	NCT02129075	CDX-1401 and Poly-ICLC Vaccine Therapy With or Without CDX-301 in Treating Patients With Stage IIB-IV Melanoma	null	MAGEA3	Suspended	No Results Available	Cutaneous Melanoma|Mucosal Melanoma|NY-ESO-1 Positive Tumor Cells Present|Ocular Melanoma|Stage IIB Cutaneous Melanoma AJCC v6 and v7|Stage IIC Cutaneous Melanoma AJCC v6 and v7|Stage III Cutaneous Melanoma AJCC v7|Stage IIIA Cutaneous Melanoma AJCC v7|Stage IIIB Cutaneous Melanoma AJCC v7|Stage IIIC Cutaneous Melanoma AJCC v7|Stage IV Cutaneous Melanoma AJCC v6 and v7	Biological: DEC-205/NY-ESO-1 Fusion Protein CDX-1401|Other: Laboratory Biomarker Analysis|Biological: Neoantigen-based Melanoma-Poly-ICLC Vaccine|Other: Pharmacological Study|Biological: Recombinant Flt3 Ligand	Immune T-cell response to NY-ESO-1|T cell responses to other ongoing and nascent antitumor response antigens associated with melanoma (e.g. PRAME, MAGEA3, p53, and gp1000) as well as memory and chronic viral responses (CMV, EBV)|Frequency and phenotypic character of PBMC subsets including DCs, monocyte populations, T cells, and NK cells|Incidence of adverse events, graded and reported using the N…	National Cancer Institute (NCI)	All	18 Years and older Â (Adult, Senior)	Phase 2	100	NIH	Interventional	Allocation: Randomized|Intervention Model: Parallel Assignment|Masking: None (Open Label)|Primary Purpose: Treatment	NCI-2014-00898|s14-01284|CITN-07-FLT3L|P30CA015704|U01CA154967	2014-04-09	2020-02-02	null	2014-05-02	null	2018-03-05	University of Chicago Comprehensive Cancer Center, Chicago, Illinois, United States|Laura and Isaac Perlmutter Cancer Center at NYU Langone, New York, New York, United States|Mount Sinai Hospital, New York, New York, United States|Duke University Medical Center, Durham, North Carolina, United States|Cleveland Clinic Foundation, Cleveland, Ohio, United States|Providence Portland Medical Center, Po…	https://ClinicalTrials.gov/show/NCT02129075
