# Supplementary material for: Differential expression of MAGEA6 toggles autophagy to promote pancreatic cancer progression
Source: eLife. 2020 Apr 9;9:e48963. doi: 10.7554/eLife.48963 (PMC7164953; doi:10.7554/eLife.48963)
Supplement: Supplementary file 3. — Recurrent mutations of MAGEA3, A4, A6, A10 and A12 genes identified from skin, lung and pancreas cancer patients in ICGC, TCGA and COSMIC databases. [file elife-48963-supp3.xlsx]

## Sheet: Sheet1
Supplementary File 3. MAGEA variants reported in skin, lung and pancreas cancer patients.
Hugo_Symbol	Chromosome	Start_Position	End_Position	Mutation_Type	Reference_Allele	Tumor_Seq_Allele	Protein_Change	Cancer_Type	Sample	Source	Mutagensis Primer
MAGEA3	X	151935815	151935815	Missense_Mutation	G	A	p.H118Y	Skin	TCGA-EE-A2GN-06	TCGA	gaaggtggccgagttggttTattttctgctcctcaagtatcgagccaggg
MAGEA3	X	151935815	151935815	Substitution - Missense	G	A	p.H118Y	Skin	PT16_1	COSMIC	gaaggtggccgagttggttTattttctgctcctcaagtatcgagccaggg
MAGEA3	X	151935724	151935724	Substitution - Missense	G	A	p.P148L	Skin	TCGA-IH-A3EA-01	COSMIC	aattggcagtatttctttcTtgtgatcttcagcaaagcttccagttcctt
MAGEA3	X	151935725	151935725	Missense_Mutation	G	A	p.P148S	Skin	60413de1-6cd2-4f74-8180-3bdd394d6d16	ICGC	aaattggcagtatttctttTctgtgatcttcagcaaagcttccagttcct
MAGEA3	X	151935608	151935608	Missense_Mutation	C	T	p.D187N	Skin	TCGA-EE-A2GH-06	TCGA	ctgcctgggcctctcctacAatggcctgctgggtgacaatcagatcatgc
MAGEA3	X	151935608	151935608	Missense_Mutation	C	T	p.D187N	Skin	TCGA-W3-A824-06	TCGA	ctgcctgggcctctcctacAatggcctgctgggtgacaatcagatcatgc
MAGEA3	X	151935608	151935608	Substitution - Missense	C	T	p.D187N	Skin	YURTHE	COSMIC	ctgcctgggcctctcctacAatggcctgctgggtgacaatcagatcatgc
MAGEA3	X	151935382	151935382	Missense_Mutation	G	A	p.P262L	Skin	TCGA-GN-A9SD-06	TCGA	ctggagtaccggcaggtccTcggcagtgatcctgcatgttatgaattcct
MAGEA3	X	151935383	151935383	Missense_Mutation	G	C	p.P262A	Skin	TCGA-GN-A9SD-06	TCGA	cctggagtaccggcaggtcGccggcagtgatcctgcatgttatgaattcc
MAGEA3	X	151935359	151935359	Missense_Mutation	C	T	p.E270K	Pancreas	7ccb9a4d-6f48-41c2-a630-27fde8c67d60	ICGC	cagtgatcctgcatgttatAaattcctgtggggtccaagggccctcgttg
MAGEA3	X	151935359	151935359	Substitution - Missense	C	T	p.E270K	Skin	46M	COSMIC	cagtgatcctgcatgttatAaattcctgtggggtccaagggccctcgttg
MAGEA3	X	151935268	151935268	Missense_Mutation	G	A	p.S300F	Skin	TCGA-D3-A51J-06	TCGA	agtggaggacctcacatttTctacccacccctgcatgagtgggttttgag
MAGEA3	X	151935268	151935268	Substitution - Missense	G	A	p.S300F	Skin	YUVAIL	COSMIC	agtggaggacctcacatttTctacccacccctgcatgagtgggttttgag
MAGEA3	X	151935268	151935268	Substitution - Missense	G	A	p.S300F	Skin	PT48	COSMIC	agtggaggacctcacatttTctacccacccctgcatgagtgggttttgag
MAGEA3	X	151935268	151935268	Substitution - Missense	G	A	p.S300F	Skin	YUTEPA	COSMIC	agtggaggacctcacatttTctacccacccctgcatgagtgggttttgag
MAGEA3	X	151935230	151935230	Frame_Shift_Del	C	-	p.E313Kfs*28	Lung	TCGA-55-1595-01	TCGA	agtgggttttgagagaggggaagagtgaCCCAACTTTCTTGTACAAAGTT
MAGEA3	X	151935230	151935230	Substitution - Missense	C	T	p.E313K	Skin	TCGA-EB-A431-01	COSMIC	gtgggttttgagagaggggAaagagtgaCCCAACTTTCTTGTACAAAGTT
MAGEA4	X	151092251	151092251	Missense_Mutation	G	T	p.A39S	Lung	TCGA-50-5946-01	TCGA	tactgaggagcaggaggctTctgtctcctcctcctctcctctggtccctg
MAGEA4	X	151092251	151092251	Substitution - Missense	G	T	p.A39S	Lung	TCGA-50-5946-02	COSMIC	tactgaggagcaggaggctTctgtctcctcctcctctcctctggtccctg
MAGEA4	X	151092423	151092423	Substitution - Missense	C	A	p.P96Q	Lung	S00944	COSMIC	agccaagaagaggaggggcAaagcacctcgcctgacgcagagtccttgtt
MAGEA4	X	151092423	151092423	Missense_Mutation	C	A	p.P96Q	Lung	TCGA-22-5492-01	TCGA	agccaagaagaggaggggcAaagcacctcgcctgacgcagagtccttgtt
MAGEA4	X	151092581	151092581	Missense_Mutation	C	T	p.P149S	Skin	TCGA-WE-A8ZN-06	TCGA	aaattacaagcgctgctttTctgtgatcttcggcaaagcctccgagtccc
MAGEA4	X	151092581	151092581	Substitution - Missense	C	T	p.P149S	Skin	YURAY	COSMIC	aaattacaagcgctgctttTctgtgatcttcggcaaagcctccgagtccc
MAGEA4	X	151092603	151092603	Missense_Mutation	C	T	p.S156F	Skin	TCGA-D3-A2JF-06	TCGA	gtgatcttcggcaaagcctTcgagtccctgaagatgatctttggcattga
MAGEA4	X	151092603	151092603	Substitution - Missense	C	T	p.S156F	Skin	CSCC-31-T	COSMIC	gtgatcttcggcaaagcctTcgagtccctgaagatgatctttggcattga
MAGEA4	X	151092682	151092682	Nonsense_Mutation	C	A	p.C182*	Lung	TCGA-78-7158-01	TCGA	cctacacccttgtcacctgActgggcctttcctatgatggcctgctgggt
MAGEA4	X	151092682	151092682	Nonsense_Mutation	C	A	p.C182*	Lung	TCGA-78-7158-01	ICGC	cctacacccttgtcacctgActgggcctttcctatgatggcctgctgggt
MAGEA4	X	151092738	151092738	Substitution - Missense	G	T	p.G201V	Lung	LUAD-B00859	COSMIC	cagatctttcccaagacagTccttctgataatcgtcctgggcacaattgc
MAGEA4	X	151092738	151092738	Missense_Mutation	G	T	p.G201V	Lung	TCGA-77-8140-01	TCGA	cagatctttcccaagacagTccttctgataatcgtcctgggcacaattgc
MAGEA4	X	151092737	151092737	Missense_Mutation	G	A	p.G201S	Skin	TCGA-FR-A729-06	TCGA	tcagatctttcccaagacaAgccttctgataatcgtcctgggcacaattg
MAGEA4	X	151092935	151092935	Substitution - Missense	C	A	p.P267T	Lung	S02241	COSMIC	gcaggtacccggcagtaatActgcgcgctatgagttcctgtggggtccaa
MAGEA4	X	151092935	151092935	Substitution - Missense	C	T	p.P267S	Skin	CSCC-5-T	COSMIC	gcaggtacccggcagtaatTctgcgcgctatgagttcctgtggggtccaa
MAGEA4	X	151093032	151093032	Missense_Mutation	G	A	p.R299H	Lung	TCGA-78-7539-01	TCGA	agggtcaatgcaagagttcAcattgcctacccatccctgcgtgaagcagc
MAGEA4	X	151093079	151093079	Substitution - Nonsense	G	T	p.E315*	Lung	TCGA-21-1070-01	COSMIC	agctttgttagaggaggaaTagggagtctgaCCCAACTTTCTTGTACAAA
MAGEA4	X	151093079	151093079	Substitution - Missense	G	A	p.E315K	Skin	PT51	COSMIC	agctttgttagaggaggaaAagggagtctgaCCCAACTTTCTTGTACAAA
MAGEA6	X	151869542	151869542	Missense_Mutation	C	A	p.P78T	Lung	TCGA-75-5126-01	TCGA	ccccactaccatgaactacActctctggagccaatcctatgaggactcca
MAGEA6	X	151869543	151869543	Substitution - Missense	C	T	p.P78L	Skin	TCGA-ER-A1A1-06	COSMIC	cccactaccatgaactaccTtctctggagccaatcctatgaggactccag
MAGEA6	X	151869605	151869605	Missense_Mutation	C	T	p.P99S	Lung	TCGA-34-5232-01	TCGA	ggaggggccaagcaccttcTctgacctggagtctgagttccaagcagcac
MAGEA6	X	151869605	151869605	Substitution - Missense	C	T	p.P99S	Skin	TCGA-GF-A6C9-06	COSMIC	ggaggggccaagcaccttcTctgacctggagtctgagttccaagcagcac
MAGEA6	X	151869684	151869684	Missense_Mutation	G	A	p.R125Q	Skin	TCGA-EE-A29C-06	TCGA	tttctgctcctcaagtatcAagccagggagccggtcacaaaggcagaaat
MAGEA6	X	151869683	151869683	Substitution - Nonsense	C	T	p.R125*	Skin	49M	COSMIC	ttttctgctcctcaagtatTgagccagggagccggtcacaaaggcagaaa
MAGEA6	X	151869683	151869683	Substitution - Nonsense	C	T	p.R125*	Skin	37M	COSMIC	ttttctgctcctcaagtatTgagccagggagccggtcacaaaggcagaaa
MAGEA6	X	151869752	151869752	Missense_Mutation	C	T	p.P148S	Skin	TCGA-D9-A3Z1-06	TCGA	aaattggcagtacttctttTctgtgatcttcagcaaagcttccgattcct
MAGEA6	X	151869752	151869752	Substitution - Missense	C	T	p.P148S	Skin	PT33	COSMIC	aaattggcagtacttctttTctgtgatcttcagcaaagcttccgattcct
MAGEA6	X	151869776	151869776	Missense_Mutation	G	T	p.D156Y	Lung	TCGA-64-5774-01	TCGA	gatcttcagcaaagcttccTattccttgcagctggtctttggcatcgagc
MAGEA6	X	151869776	151869776	Substitution - Missense	G	A	p.D156N	Skin	TCGA-GF-A6C9-06	COSMIC	gatcttcagcaaagcttccAattccttgcagctggtctttggcatcgagc
MAGEA6	X	151869780	151869780	Missense_Mutation	C	T	p.S157F	Skin	TCGA-EE-A180-06	TCGA	ttcagcaaagcttccgattTcttgcagctggtctttggcatcgagctgat
MAGEA6	X	151869780	151869780	Substitution - Missense	C	T	p.S157F	Skin	YULAN	COSMIC	ttcagcaaagcttccgattTcttgcagctggtctttggcatcgagctgat
MAGEA6	X	151869832	151869832	Substitution - Missense	C	A	p.H174Q	Lung	LUAD-D02085	COSMIC	aagtggaccccatcggccaAgtgtacatctttgccacctgcctgggcctc
MAGEA6	X	151869832	151869832	Substitution - Missense	C	A	p.H174Q	Lung	LUAD-LC15C	COSMIC	aagtggaccccatcggccaAgtgtacatctttgccacctgcctgggcctc
MAGEA6	X	151869852	151869852	Missense_Mutation	G	T	p.C181F	Lung	fab3d6f4-de1c-4d6c-bdea-ac39a7884657	ICGC	gtgtacatctttgccacctTcctgggcctctcctacgatggcctgctggg
MAGEA6	X	151869852	151869852	Missense_Mutation	G	T	p.C181F	Lung	TCGA-77-6843-01	TCGA	gtgtacatctttgccacctTcctgggcctctcctacgatggcctgctggg
MAGEA6	X	151869869	151869869	Substitution - Missense	G	A	p.D187N	Lung	LUAD-D01603	COSMIC	ctgcctgggcctctcctacAatggcctgctgggtgacaatcagatcatgc
MAGEA6	X	151869869	151869869	Missense_Mutation	G	A	p.D187N	Skin	TCGA-D3-A3C8-06	TCGA	ctgcctgggcctctcctacAatggcctgctgggtgacaatcagatcatgc
MAGEA6	X	151869869	151869869	Missense_Mutation	G	A	p.D187N	Skin	TCGA-EE-A29T-06	TCGA	ctgcctgggcctctcctacAatggcctgctgggtgacaatcagatcatgc
MAGEA6	X	151869869	151869869	Substitution - Missense	G	A	p.D187N	Skin	ME100L	COSMIC	ctgcctgggcctctcctacAatggcctgctgggtgacaatcagatcatgc
MAGEA6	X	151869890	151869890	Substitution - Nonsense	C	T	p.Q194*	Skin	TCGA-D3-A5GO-06	COSMIC	tggcctgctgggtgacaatTagatcatgcccaagacaggcttcctgataa
MAGEA6	X	151869890	151869890	Substitution - Nonsense	C	T	p.Q194*	Skin	PT51	COSMIC	tggcctgctgggtgacaatTagatcatgcccaagacaggcttcctgataa
MAGEA6	X	151869929	151869929	Missense_Mutation	G	A	p.A207T	Lung	TCGA-49-AARN-01	TCGA	cttcctgataatcatcctgAccataatcgcaaaagagggcgactgtgccc
MAGEA6	X	151869929	151869929	Missense_Mutation	G	T	p.A207S	Lung	TCGA-85-8287-01	TCGA	cttcctgataatcatcctgTccataatcgcaaaagagggcgactgtgccc
MAGEA6	X	151870013	151870013	Missense_Mutation	G	A	p.E235K	Skin	TCGA-ER-A198-06	TCGA	agaggtgtttgaggggaggAaagacagtatcttcggggatcccaagaagc
MAGEA6	X	151870013	151870013	Substitution - Missense	G	A	p.E235K	Skin	40M	COSMIC	agaggtgtttgaggggaggAaagacagtatcttcggggatcccaagaagc
MAGEA6	X	151870035	151870035	Missense_Mutation	C	T	p.P242L	Skin	TCGA-DA-A1HV-06	TCGA	gacagtatcttcggggatcTcaagaagctgctcacccaatatttcgtgca
MAGEA6	X	151870034	151870034	Missense_Mutation	C	T	p.P242S	Skin	TCGA-ER-A19A-06	TCGA	agacagtatcttcggggatTccaagaagctgctcacccaatatttcgtgc
MAGEA6	X	151870071	151870071	Substitution - Missense	A	T	p.N254I	Pancreas	8044841	COSMIC	caatatttcgtgcaggaaaTctacctggagtaccggcaggtccccggcag
MAGEA6	X	151870071	151870071	Substitution - Missense	A	T	p.N254I	Pancreas	PACA86	COSMIC	caatatttcgtgcaggaaaTctacctggagtaccggcaggtccccggcag
MAGEA6	X	151870130	151870130	Missense_Mutation	G	A	p.G274S	Lung	TCGA-21-5784-01	TCGA	atgctatgagttcctgtggAgtccaagggccctcattgaaaccagctatg
MAGEA6	X	151870130	151870130	Missense_Mutation	G	A	p.G274S	Skin	TCGA-EE-A3AE-06	TCGA	atgctatgagttcctgtggAgtccaagggccctcattgaaaccagctatg
MAGEA6	X	151870201	151870201	Frame_Shift_Del	T	-	p.R298Afs*12	Lung	TCGA-97-7554-01	TCGA	gtaaagatcagtggaggacccgcatttcctacccactcctgcatgagtgg
MAGEA6	X	151870222	151870232	Deletion - Frameshift	c.912_922del11	c.912_922del11	p.H305fs*>7	Pancreas	ICGC_0050	COSMIC	cgcatttcctacccactcct-ctttgagagagggggaagagtgaCCCAACT
MAGEA6	X	151870222	151870232	Deletion - Frameshift	c.912_922del11	c.912_922del11	p.H305fs*>7	Pancreas	8015127	COSMIC	cgcatttcctacccactcct-ctttgagagagggggaagagtgaCCCAACT
MAGEA10	X	151303936	151303936	Missense_Mutation	G	A	p.P53S	Skin	TCGA-DA-A1I5-06	TCGA	ctcttttccatcctcttttTcctcctcctcctcttcctcctcctcctcct
MAGEA10	X	151303936	151303936	Missense_Mutation	G	A	p.P53S	Skin	TCGA-FS-A1ZA-06	TCGA	ctcttttccatcctcttttTcctcctcctcctcttcctcctcctcctcct
MAGEA10	X	151303935	151303936	Substitution - Missense	GG	AA	p.P53F	Skin	CSCC-27-T	COSMIC	tcttttccatcctcttttTTctcctcctcctcttcctcctcctcctcctg
MAGEA10	X	151303936	151303936	Substitution - Missense	G	A	p.P53S	Skin	35M	COSMIC	ctcttttccatcctcttttTcctcctcctcctcttcctcctcctcctcct
MAGEA10	X	151303936	151303936	Substitution - Missense	G	A	p.P53S	Skin	CSCC-62-T	COSMIC	ctcttttccatcctcttttTcctcctcctcctcttcctcctcctcctcct
MAGEA10	X	151303936	151303936	Missense_Mutation	G	A	p.P53S	Skin	7ba70717-d65e-4a45-af79-60a976770526	ICGC	ctcttttccatcctcttttTcctcctcctcctcttcctcctcctcctcct
MAGEA10	X	151303874	151303874	Substitution - Missense	C	A	p.E73D	Lung	TCGA-18-3410-01	COSMIC	taccaagcaccccagaggaTgtttctgctgatgatgagacaccaaatcct
MAGEA10	X	151303876	151303876	Substitution - Missense	C	T	p.E73K	Skin	2492722	COSMIC	aataccaagcaccccagagAaggtttctgctgatgatgagacaccaaatc
MAGEA10	X	151303876	151303876	Substitution - Missense	C	T	p.E73K	Skin	2492723	COSMIC	aataccaagcaccccagagAaggtttctgctgatgatgagacaccaaatc
MAGEA10	X	151303876	151303876	Substitution - Missense	C	T	p.E73K	Skin	Au1	COSMIC	aataccaagcaccccagagAaggtttctgctgatgatgagacaccaaatc
MAGEA10	X	151303876	151303876	Substitution - Missense	C	T	p.E73K	Skin	2492720	COSMIC	aataccaagcaccccagagAaggtttctgctgatgatgagacaccaaatc
MAGEA10	X	151303876	151303876	Substitution - Missense	C	T	p.E73K	Skin	2492721	COSMIC	aataccaagcaccccagagAaggtttctgctgatgatgagacaccaaatc
MAGEA10	X	151303864	151303864	Missense_Mutation	C	T	p.D77N	Skin	TCGA-FW-A3TV-06	TCGA	cccagaggaggtttctgctAatgatgagacaccaaatcctccccagagtg
MAGEA10	X	151303864	151303864	Substitution - Missense	C	T	p.D77N	Skin	YULAN	COSMIC	cccagaggaggtttctgctAatgatgagacaccaaatcctccccagagtg
MAGEA10	X	151303864	151303864	Substitution - Missense	C	T	p.D77N	Skin	49M	COSMIC	cccagaggaggtttctgctAatgatgagacaccaaatcctccccagagtg
MAGEA10	X	151303845	151303845	Substitution - Missense	G	A	p.P83L	Skin	TCGA-ER-A194-01	COSMIC	gatgatgagacaccaaatcTtccccagagtgctcagatagcctgctcctc
MAGEA10	X	151303846	151303846	Substitution - Missense	G	A	p.P83S	Skin	TCGA-EE-A2MS-06	COSMIC	tgatgatgagacaccaaatTctccccagagtgctcagatagcctgctcct
MAGEA10	X	151303846	151303846	Missense_Mutation	G	A	p.P83S	Skin	25103371-28ac-4f43-b0e2-2d376d0dcb84	ICGC	tgatgatgagacaccaaatTctccccagagtgctcagatagcctgctcct
MAGEA10	X	151303813	151303813	Missense_Mutation	G	T	p.P94T	Lung	TCGA-43-5668-01	TCGA	tcagatagcctgctcctccAcctcggtcgttgcttcccttccattagatc
MAGEA10	X	151303812	151303812	Missense_Mutation	G	A	p.P94L	Skin	TCGA-D3-A3C7-06	TCGA	cagatagcctgctcctcccTctcggtcgttgcttcccttccattagatca
MAGEA10	X	151303763	151303763	Substitution - Missense	G	T	p.S110R	Lung	LUAD-S01482	COSMIC	aatctgatgagggctccagAagccaaaaggaggagagtccaagcacccta
MAGEA10	X	151303764	151303764	Substitution - Missense	C	T	p.S110N	Pancreas	16	COSMIC	caatctgatgagggctccaAcagccaaaaggaggagagtccaagcaccct
MAGEA10	X	151303687	151303687	Missense_Mutation	C	T	p.E136K	Skin	TCGA-D3-A8GC-06	TCGA	acccagaagtgagatagatAaaaaggtgactgatttggtgcagtttctgc
MAGEA10	X	151303687	151303687	Substitution - Missense	C	T	p.E136K	Skin	TCGA-ER-A194-01	COSMIC	acccagaagtgagatagatAaaaaggtgactgatttggtgcagtttctgc
MAGEA10	X	151303507	151303507	Missense_Mutation	G	A	p.P196S	Skin	TCGA-GN-A267-06	TCGA	tgatgtaaaggaagtggatTccactggccactcctttgtccttgtcacct
MAGEA10	X	151303507	151303507	Missense_Mutation	G	A	p.P196S	Skin	TCGA-QB-A6FS-06	TCGA	tgatgtaaaggaagtggatTccactggccactcctttgtccttgtcacct
MAGEA10	X	151303507	151303507	Substitution - Missense	G	A	p.P196S	Skin	TCGA-EE-A2M5-06	COSMIC	tgatgtaaaggaagtggatTccactggccactcctttgtccttgtcacct
MAGEA10	X	151303419	151303419	Missense_Mutation	C	A	p.G225V	Lung	TCGA-56-7731-01	TCGA	cagagcatgcccaagactgTcattctcatacttatcctaagcataatctt
MAGEA10	X	151303420	151303420	Substitution - Missense	C	A	p.G225C	Skin	7	COSMIC	ccagagcatgcccaagactTgcattctcatacttatcctaagcataatct
MAGEA10	X	151303381	151303381	Substitution - Missense	C	T	p.G238S	Skin	PT42	COSMIC	aagcataatcttcatagagAgctactgcacccctgaggaggtcatctggg
MAGEA10	X	151303380	151303380	Substitution - Missense	C	T	p.G238D	Skin	PT42	COSMIC	agcataatcttcatagaggActactgcacccctgaggaggtcatctggga
MAGEA10	X	151303337	151303337	Missense_Mutation	C	T	p.M252I	Skin	TCGA-Z2-AA3V-06	TCGA	tctgggaagcactgaatatAatggggctgtatgatgggatggagcacctc
MAGEA10	X	151303337	151303337	Substitution - Missense	C	T	p.M252I	Skin	YUPAT	COSMIC	tctgggaagcactgaatatAatggggctgtatgatgggatggagcacctc
MAGEA10	X	151303337	151303337	Substitution - Missense	C	T	p.M252I	Skin	TCGA-GF-A6C9-06	COSMIC	tctgggaagcactgaatatAatggggctgtatgatgggatggagcacctc
MAGEA10	X	151303337	151303337	Substitution - Missense	C	T	p.M252I	Skin	TCGA-EB-A431-01	COSMIC	tctgggaagcactgaatatAatggggctgtatgatgggatggagcacctc
MAGEA10	X	151303261	151303261	Missense_Mutation	C	T	p.E278K	Skin	TCGA-ER-A19G-06	TCGA	cacccaagattgggtgcagAaaaactacctggagtaccggcaggtgcctg
MAGEA10	X	151303261	151303261	Substitution - Missense	C	T	p.E278K	Skin	1_PRE-TREATMENT	COSMIC	cacccaagattgggtgcagAaaaactacctggagtaccggcaggtgcctg
MAGEA10	X	151303261	151303261	Substitution - Missense	C	T	p.E278K	Skin	1_RESISTANT	COSMIC	cacccaagattgggtgcagAaaaactacctggagtaccggcaggtgcctg
MAGEA10	X	151303222	151303222	Substitution - Missense	G	A	p.P291S	Skin	2492709	COSMIC	gcaggtgcctggcagtgatTctgcacggtatgagtttctgtggggtccaa
MAGEA10	X	151303222	151303222	Substitution - Missense	G	A	p.P291S	Skin	2492710	COSMIC	gcaggtgcctggcagtgatTctgcacggtatgagtttctgtggggtccaa
MAGEA10	X	151303222	151303222	Substitution - Missense	G	A	p.P291S	Skin	TCGA-EB-A3XD-01	COSMIC	gcaggtgcctggcagtgatTctgcacggtatgagtttctgtggggtccaa
MAGEA10	X	151303222	151303222	Substitution - Missense	G	A	p.P291S	Skin	2492708	COSMIC	gcaggtgcctggcagtgatTctgcacggtatgagtttctgtggggtccaa
MAGEA10	X	151303180	151303180	Missense_Mutation	C	T	p.E305K	Lung	TCGA-05-5715-01	TCGA	gggtccaagggctcatgctAaaattaggaagatgagtctcctgaaatttt
MAGEA10	X	151303180	151303180	Missense_Mutation	C	T	p.E305K	Lung	TCGA-75-6214-01	TCGA	gggtccaagggctcatgctAaaattaggaagatgagtctcctgaaatttt
MAGEA10	X	151303129	151303129	Substitution - Missense	C	T	p.D322N	Skin	2492722	COSMIC	ggccaaggtaaatgggagtAatccaagatccttcccactgtggtatgagg
MAGEA10	X	151303129	151303129	Substitution - Missense	C	T	p.D322N	Skin	2492720	COSMIC	ggccaaggtaaatgggagtAatccaagatccttcccactgtggtatgagg
MAGEA10	X	151303129	151303129	Substitution - Missense	C	T	p.D322N	Skin	2492721	COSMIC	ggccaaggtaaatgggagtAatccaagatccttcccactgtggtatgagg
MAGEA10	X	151303129	151303129	Substitution - Missense	C	T	p.D322N	Skin	2492723	COSMIC	ggccaaggtaaatgggagtAatccaagatccttcccactgtggtatgagg
MAGEA12	X	151900743	151900743	Missense_Mutation	C	T	p.G20R	Skin	TCGA-D3-A8GC-06	TCGA	ggaaggccttgaggcccaaAgagaggccctgggcttggtgggtgcgcagg
MAGEA12	X	151900742	151900742	Missense_Mutation	C	A	p.G20V	Skin	TCGA-FS-A4F5-06	TCGA	gaaggccttgaggcccaagTagaggccctgggcttggtgggtgcgcaggc
MAGEA12	X	151900743	151900743	Missense_Mutation	C	T	p.G20R	Skin	TCGA-FS-A4F5-06	TCGA	ggaaggccttgaggcccaaAgagaggccctgggcttggtgggtgcgcagg
MAGEA12	X	151900743	151900743	Substitution - Missense	C	T	p.G20R	Skin	TCGA-EE-A3J5-06	COSMIC	ggaaggccttgaggcccaaAgagaggccctgggcttggtgggtgcgcagg
MAGEA12	X	151900551	151900551	Missense_Mutation	C	T	p.D84N	Skin	TCGA-QB-AA9O-06	TCGA	tactctctggagtcaatccAatgagggctccagcaacgaagaacaggaag
MAGEA12	X	151900551	151900551	Missense_Mutation	C	T	p.D84N	Skin	f07b9192-c86f-4ee4-a3b5-feb9c5098bf4	ICGC	tactctctggagtcaatccAatgagggctccagcaacgaagaacaggaag
MAGEA12	X	151900428	151900428	Substitution - Missense	G	C	p.R125G	Lung	1946219	COSMIC	ttttctgctcctcaagtatGgagccagggagccattcacaaaggcagaaa
MAGEA12	X	151900428	151900428	Substitution - Missense	G	C	p.R125G	Lung	HF-23896	COSMIC	ttttctgctcctcaagtatGgagccagggagccattcacaaaggcagaaa
MAGEA12	X	151900428	151900428	Nonsense_Mutation	G	A	p.R125*	Skin	TCGA-EE-A2GJ-06	TCGA	ttttctgctcctcaagtatTgagccagggagccattcacaaaggcagaaa
MAGEA12	X	151900428	151900428	Nonsense_Mutation	G	A	p.R125*	Skin	TCGA-ER-A19F-06	TCGA	ttttctgctcctcaagtatTgagccagggagccattcacaaaggcagaaa
MAGEA12	X	151900427	151900427	Substitution - Missense	C	T	p.R125Q	Skin	TCGA-ER-A193-06	COSMIC	tttctgctcctcaagtatcAagccagggagccattcacaaaggcagaaat
MAGEA12	X	151900427	151900427	Substitution - Missense	C	T	p.R125Q	Skin	Au3	COSMIC	tttctgctcctcaagtatcAagccagggagccattcacaaaggcagaaat
MAGEA12	X	151900428	151900428	Substitution - Nonsense	G	A	p.R125*	Skin	YUMER	COSMIC	ttttctgctcctcaagtatTgagccagggagccattcacaaaggcagaaa
MAGEA12	X	151900218	151900218	Missense_Mutation	T	A	p.I195F	Pancreas	1a0ef226-41a5-4b56-9078-4b7834f0c976	ICGC	cctgctgggcgacaatcagTtcgtgcccaagacaggcctcctgataatcg
MAGEA12	X	151900218	151900218	Substitution - Missense	T	A	p.I195F	Pancreas	PCSI_0004_Pa_P_526	COSMIC	cctgctgggcgacaatcagTtcgtgcccaagacaggcctcctgataatcg
MAGEA12	X	151900218	151900218	Substitution - Missense	T	G	p.I195L	Pancreas	PDA_066	COSMIC	cctgctgggcgacaatcagCtcgtgcccaagacaggcctcctgataatcg
MAGEA12	X	151900061	151900061	Missense_Mutation	G	A	p.T247I	Lung	TCGA-64-1679-01	TCGA	catcccaggaagctgctcaTccaagatttggtgcaggaaaactacctgga
MAGEA12	X	151900060	151900061	Substitution - Missense	GG	AC	p.T247M	Lung	TCGA-64-1679-01	COSMIC	atcccaggaagctgctcaGTcaagatttggtgcaggaaaactacctggag
MAGEA12	X	151900044	151900044	Missense_Mutation	C	T	p.E253K	Skin	TCGA-EE-A3AD-06	TCGA	cacccaagatttggtgcagAaaaactacctggagtaccggcaggtccccg
MAGEA12	X	151900044	151900044	Substitution - Missense	C	T	p.E253K	Skin	PT48	COSMIC	cacccaagatttggtgcagAaaaactacctggagtaccggcaggtccccg
MAGEA12	X	151900044	151900044	Substitution - Missense	C	T	p.E253K	Skin	12M	COSMIC	cacccaagatttggtgcagAaaaactacctggagtaccggcaggtccccg
MAGEA12	X	151900044	151900044	Missense_Mutation	C	T	p.E253K	Skin	5c3def3a-b515-41f6-8157-681b963534e7	ICGC	cacccaagatttggtgcagAaaaactacctggagtaccggcaggtccccg
MAGEA12	X	151900005	151900005	Substitution - Missense	G	A	p.P266S	Skin	1_RESISTANT	COSMIC	gcaggtccccggcagtgatTctgcatgctacgagttcctgtggggtccaa
MAGEA12	X	151900004	151900004	Substitution - Missense	G	A	p.P266L	Skin	YUROL	COSMIC	caggtccccggcagtgatcTtgcatgctacgagttcctgtggggtccaag
MAGEA12	X	151900005	151900005	Substitution - Missense	G	A	p.P266S	Skin	1_PRE-TREATMENT	COSMIC	gcaggtccccggcagtgatTctgcatgctacgagttcctgtggggtccaa
MAGEA12	X	151899902	151899902	Missense_Mutation	G	A	p.S300F	Skin	TCGA-EE-A2MI-06	TCGA	agtggaggacctcacatttTctacccacccctgcatgaatgggcttttag
MAGEA12	X	151899902	151899902	Substitution - Missense	G	A	p.S300F	Skin	TCGA-EE-A2GO-06	COSMIC	agtggaggacctcacatttTctacccacccctgcatgaatgggcttttag
MAGEA12	X	151899902	151899902	Substitution - Missense	G	A	p.S300F	Skin	YUOTHO	COSMIC	agtggaggacctcacatttTctacccacccctgcatgaatgggcttttag
MAGEA12	X	151899902	151899902	Missense_Mutation	G	A	p.S300F	Skin	30600994-c1ec-44c9-a620-3f6c617eb928	ICGC	agtggaggacctcacatttTctacccacccctgcatgaatgggcttttag
MAGEA12	X	151899893	151899893	Missense_Mutation	G	T	p.P303H	Lung	TCGA-05-4430-01	TCGA	cctcacatttcctacccacAcctgcatgaatgggcttttagagaggggga
MAGEA12	X	151899893	151899893	Substitution - Missense	G	A	p.P303L	Skin	Au4	COSMIC	cctcacatttcctacccacTcctgcatgaatgggcttttagagaggggga
